# Supplementary material for: Portable, low-cost, Raspberry Pi-based optical sensor (PiSENS): continuous monitoring of atmospheric nitrogen dioxide
Source: Royal Society of Chemistry journal article supplement (doi:10.1039/d2ay01433e), 2022-12-22
Supplement: d2ay01433e2.xlsx [file d2ay01433e2.xlsx]

## Sheet: AirQualityDataHourly for 160722
Hourly measurement data supplied by UK-air on 19/07/2022
All Data GMT hour ending
Status: V=Verified P=Provisionaly Verified N=Not Verified S=Suspect
		Stoke-on-Trent Centre
Date	Time	Ozone	Status	Nitrogen dioxide	Status
2022-07-01	01:00:00	28.1394	P ugm-3	20.0813	P ugm-3
2022-07-01	02:00:00	23.5493	P ugm-3	22.185	P ugm-3
2022-07-01	03:00:00	28.1394	P ugm-3	15.4913	P ugm-3
2022-07-01	04:00:00	21.9527	P ugm-3	19.3163	P ugm-3
2022-07-01	05:00:00	25.1458	P ugm-3	11.6662	P ugm-3
2022-07-01	06:00:00	25.7445	P ugm-3	15.8737	P ugm-3
2022-07-01	07:00:00	17.5622	P ugm-3	20.655	P ugm-3
2022-07-01	08:00:00	20.9549	P ugm-3	18.5512	P ugm-3
2022-07-01	09:00:00	24.7467	P ugm-3	16.6388	P ugm-3
2022-07-01	10:00:00	29.5364	P ugm-3	13.77	P ugm-3
2022-07-01	11:00:00	38.517	P ugm-3	13.5787	P ugm-3
2022-07-01	12:00:00	42.708	P ugm-3	16.83	P ugm-3
2022-07-01	13:00:00	38.1179	P ugm-3	16.2563	P ugm-3
2022-07-01	14:00:00	43.5063	P ugm-3	14.3438	P ugm-3
2022-07-01	15:00:00	49.8925	P ugm-3	9.75375	P ugm-3
2022-07-01	16:00:00	54.6822	P ugm-3	7.84125	P ugm-3
2022-07-01	17:00:00	55.4805	P ugm-3	9.5625	P ugm-3
2022-07-01	18:00:00	56.8775	P ugm-3	8.415	P ugm-3
2022-07-01	19:00:00	53.4848	P ugm-3	9.18	P ugm-3
2022-07-01	20:00:00	50.6908	P ugm-3	8.7975	P ugm-3
2022-07-01	21:00:00	55.0813	P ugm-3	6.5025	P ugm-3
2022-07-01	22:00:00	52.0878	P ugm-3	8.7975	P ugm-3
2022-07-01	23:00:00	48.0964	P ugm-3	11.6662	P ugm-3
2022-07-01	1 day, 0:00:00	53.4848	P ugm-3	6.69375	P ugm-3
2022-07-02	01:00:00	49.4934	P ugm-3	6.12	P ugm-3
2022-07-02	02:00:00	48.6951	P ugm-3	5.92875	P ugm-3
2022-07-02	03:00:00	48.0964	P ugm-3	4.78125	P ugm-3
2022-07-02	04:00:00	46.1007	P ugm-3	6.31125	P ugm-3
2022-07-02	05:00:00	40.9119	P ugm-3	8.0325	P ugm-3
2022-07-02	06:00:00	39.7144	P ugm-3	7.45875	P ugm-3
2022-07-02	07:00:00	38.517	P ugm-3	8.0325	P ugm-3
2022-07-02	08:00:00	32.7295	P ugm-3	15.4913	P ugm-3
2022-07-02	09:00:00	39.3153	P ugm-3	9.5625	P ugm-3
2022-07-02	10:00:00	42.708	P ugm-3	13.1962	P ugm-3
2022-07-02	11:00:00	46.4998	P ugm-3	13.5787	P ugm-3
2022-07-02	12:00:00	44.9032	P ugm-3	14.3438	P ugm-3
2022-07-02	13:00:00	48.6951	P ugm-3	17.9775	P ugm-3
2022-07-02	14:00:00	48.6951	P ugm-3	15.6825	P ugm-3
2022-07-02	15:00:00	50.0921	P ugm-3	11.6662	P ugm-3
2022-07-02	16:00:00	51.2895	P ugm-3	13.3875	P ugm-3
2022-07-02	17:00:00	52.4869	P ugm-3	7.65	P ugm-3
2022-07-02	18:00:00	54.8817	P ugm-3	8.415	P ugm-3
2022-07-02	19:00:00	52.2873	P ugm-3	11.2837	P ugm-3
2022-07-02	20:00:00	54.0835	P ugm-3	9.18	P ugm-3
2022-07-02	21:00:00	46.1007	P ugm-3	16.065	P ugm-3
2022-07-02	22:00:00	39.5149	P ugm-3	17.9775	P ugm-3
2022-07-02	23:00:00	39.914	P ugm-3	14.9175	P ugm-3
2022-07-02	1 day, 0:00:00	41.7101	P ugm-3	9.945	P ugm-3
2022-07-03	01:00:00	39.5149	P ugm-3	11.2837	P ugm-3
2022-07-03	02:00:00	32.3303	P ugm-3	11.8575	P ugm-3
2022-07-03	03:00:00	27.3411	P ugm-3	12.6225	P ugm-3
2022-07-03	04:00:00	25.9441	P ugm-3	12.8138	P ugm-3
2022-07-03	05:00:00	25.545	P ugm-3	10.5188	P ugm-3
2022-07-03	06:00:00	22.751	P ugm-3	10.71	P ugm-3
2022-07-03	07:00:00	21.7531	P ugm-3	11.2837	P ugm-3
2022-07-03	08:00:00	29.1372	P ugm-3	7.84125	P ugm-3
2022-07-03	09:00:00	38.9162	P ugm-3	4.78125	P ugm-3
2022-07-03	10:00:00	38.3174	P ugm-3	9.18	P ugm-3
2022-07-03	11:00:00	41.7101	P ugm-3	12.4313	P ugm-3
2022-07-03	12:00:00	40.7123	P ugm-3	15.6825	P ugm-3
2022-07-03	13:00:00	41.7101	P ugm-3	15.1088	P ugm-3
2022-07-03	14:00:00	44.5041	P ugm-3	13.77	P ugm-3
2022-07-03	15:00:00	48.8946	P ugm-3	7.84125	P ugm-3
2022-07-03	16:00:00	49.0942	P ugm-3	8.98875	P ugm-3
2022-07-03	17:00:00	49.6929	P ugm-3	8.22375	P ugm-3
2022-07-03	18:00:00	51.0899	P ugm-3	8.7975	P ugm-3
2022-07-03	19:00:00	53.2852	P ugm-3	8.0325	P ugm-3
2022-07-03	20:00:00	52.4869	P ugm-3	8.98875	P ugm-3
2022-07-03	21:00:00	45.1028	P ugm-3	13.9612	P ugm-3
2022-07-03	22:00:00	34.9248	P ugm-3	21.8025	P ugm-3
2022-07-03	23:00:00	32.7295	P ugm-3	20.0813	P ugm-3
2022-07-03	1 day, 0:00:00	41.5106	P ugm-3	9.75375	P ugm-3
2022-07-04	01:00:00	43.7058	P ugm-3	9.18	P ugm-3
2022-07-04	02:00:00	49.0942	P ugm-3	5.16375	P ugm-3
2022-07-04	03:00:00	46.4998	P ugm-3	4.01625	P ugm-3
2022-07-04	04:00:00	42.3088	P ugm-3	5.92875	P ugm-3
2022-07-04	05:00:00	41.1114	P ugm-3	5.54625	P ugm-3
2022-07-04	06:00:00	37.12	P ugm-3	9.5625	P ugm-3
2022-07-04	07:00:00	33.1286	P ugm-3	14.1525	P ugm-3
2022-07-04	08:00:00	36.7209	P ugm-3	14.535	P ugm-3
2022-07-04	09:00:00	42.5084	P ugm-3	13.77	P ugm-3
2022-07-04	10:00:00	48.8946	P ugm-3	10.3275	P ugm-3
2022-07-04	11:00:00	51.6886	P ugm-3	7.07625	P ugm-3
2022-07-04	12:00:00	51.2895	P ugm-3	10.5188	P ugm-3
2022-07-04	13:00:00	52.886	P ugm-3	11.8575	P ugm-3
2022-07-04	14:00:00	51.2895	P ugm-3	11.475	P ugm-3
2022-07-04	15:00:00	54.283	P ugm-3	13.5787	P ugm-3
2022-07-04	16:00:00	55.8796	P ugm-3	13.005	P ugm-3
2022-07-04	17:00:00	52.2873	P ugm-3	18.9337	P ugm-3
2022-07-04	18:00:00	58.8732	P ugm-3	11.0925	P ugm-3
2022-07-04	19:00:00	63.0641	P ugm-3	8.0325	P ugm-3
2022-07-04	20:00:00	59.0727	P ugm-3	8.60625	P ugm-3
2022-07-04	21:00:00	54.8817	P ugm-3	10.71	P ugm-3
2022-07-04	22:00:00	50.0921	P ugm-3	12.24	P ugm-3
2022-07-04	23:00:00	50.4912	P ugm-3	8.7975	P ugm-3
2022-07-04	1 day, 0:00:00	43.7058	P ugm-3	12.24	P ugm-3
2022-07-05	01:00:00	39.5149	P ugm-3	14.9175	P ugm-3
2022-07-05	02:00:00	45.1028	P ugm-3	8.22375	P ugm-3
2022-07-05	03:00:00	43.7058	P ugm-3	10.9012	P ugm-3
2022-07-05	04:00:00	47.0985	P ugm-3	8.7975	P ugm-3
2022-07-05	05:00:00	44.5041	P ugm-3	10.5188	P ugm-3
2022-07-05	06:00:00	44.3045	P ugm-3	8.60625	P ugm-3
2022-07-05	07:00:00	44.5041	P ugm-3	8.98875	P ugm-3
2022-07-05	08:00:00	39.7144	P ugm-3	14.3438	P ugm-3
2022-07-05	09:00:00	35.1243	P ugm-3	15.3	P ugm-3
2022-07-05	10:00:00	37.5192	P ugm-3	9.75375	P ugm-3
2022-07-05	11:00:00	33.1286	P ugm-3	13.77	P ugm-3
2022-07-05	12:00:00	34.5256	P ugm-3	15.3	P ugm-3
2022-07-05	13:00:00	42.9076	P ugm-3	14.9175	P ugm-3
2022-07-05	14:00:00	47.6972	P ugm-3	17.4037	P ugm-3
2022-07-05	15:00:00	51.2895	P ugm-3	13.9612	P ugm-3
2022-07-05	16:00:00	55.2809	P ugm-3	11.2837	P ugm-3
2022-07-05	17:00:00	55.2809	P ugm-3	14.535	P ugm-3
2022-07-05	18:00:00	54.4826	P ugm-3	14.1525	P ugm-3
2022-07-05	19:00:00	59.0727	P ugm-3	10.5188	P ugm-3
2022-07-05	20:00:00	59.871	P ugm-3	10.1363	P ugm-3
2022-07-05	21:00:00	48.2959	P ugm-3	18.7425	P ugm-3
2022-07-05	22:00:00	50.6908	P ugm-3	13.5787	P ugm-3
2022-07-05	23:00:00	47.4977	P ugm-3	12.4313	P ugm-3
2022-07-05	1 day, 0:00:00	48.0964	P ugm-3	7.65	P ugm-3
2022-07-06	01:00:00	39.3153	P ugm-3	9.37125	P ugm-3
2022-07-06	02:00:00	27.5407	P ugm-3	10.1363	P ugm-3
2022-07-06	03:00:00	21.1544	P ugm-3	10.3275	P ugm-3
2022-07-06	04:00:00	18.7596	P ugm-3	5.54625	P ugm-3
2022-07-06	05:00:00	17.9613	P ugm-3	5.54625	P ugm-3
2022-07-06	06:00:00	16.9635	P ugm-3	7.84125	P ugm-3
2022-07-06	07:00:00	15.766	P ugm-3	9.5625	P ugm-3
2022-07-06	08:00:00	16.9635	P ugm-3	9.5625	P ugm-3
2022-07-06	09:00:00	18.1609	P ugm-3	11.8575	P ugm-3
2022-07-06	10:00:00	21.9527	P ugm-3	11.2837	P ugm-3
2022-07-06	11:00:00	23.7488	P ugm-3	12.8138	P ugm-3
2022-07-06	12:00:00	27.1415	P ugm-3	11.475	P ugm-3
2022-07-06	13:00:00	26.9419	P ugm-3	10.71	P ugm-3
2022-07-06	14:00:00	27.3411	P ugm-3	12.8138	P ugm-3
2022-07-06	15:00:00	30.9334	P ugm-3	11.0925	P ugm-3
2022-07-06	16:00:00	31.3325	P ugm-3	9.18	P ugm-3
2022-07-06	17:00:00	30.7338	P ugm-3	11.475	P ugm-3
2022-07-06	18:00:00	37.12	P ugm-3	8.22375	P ugm-3
2022-07-06	19:00:00	31.7316	P ugm-3	11.475	P ugm-3
2022-07-06	20:00:00	30.5342	P ugm-3	11.6662	P ugm-3
2022-07-06	21:00:00	31.3325	P ugm-3	7.84125	P ugm-3
2022-07-06	22:00:00	36.1222	P ugm-3	4.01625	P ugm-3
2022-07-06	23:00:00	36.7209	P ugm-3	4.2075	P ugm-3
2022-07-06	1 day, 0:00:00	39.1157	P ugm-3	4.9725	P ugm-3
2022-07-07	01:00:00	38.9162	P ugm-3	3.825	P ugm-3
2022-07-07	02:00:00	44.9032	P ugm-3	2.48625	P ugm-3
2022-07-07	03:00:00	45.502	P ugm-3	2.48625	P ugm-3
2022-07-07	04:00:00	46.4998	P ugm-3	3.06	P ugm-3
2022-07-07	05:00:00	45.1028	P ugm-3	4.9725	P ugm-3
2022-07-07	06:00:00	38.517	P ugm-3	8.60625	P ugm-3
2022-07-07	07:00:00	No data	N ugm-3	No data	N ugm-3
2022-07-07	08:00:00	No data	N ugm-3	No data	N ugm-3
2022-07-07	09:00:00	No data	N ugm-3	No data	N ugm-3
2022-07-07	10:00:00	22.9505	P ugm-3	26.2013	P ugm-3
2022-07-07	11:00:00	29.3368	P ugm-3	23.1412	P ugm-3
2022-07-07	12:00:00	36.9205	P ugm-3	13.77	P ugm-3
2022-07-07	13:00:00	40.7123	P ugm-3	14.535	P ugm-3
2022-07-07	14:00:00	43.3067	P ugm-3	13.9612	P ugm-3
2022-07-07	15:00:00	48.8946	P ugm-3	12.0488	P ugm-3
2022-07-07	16:00:00	45.3024	P ugm-3	17.4037	P ugm-3
2022-07-07	17:00:00	38.3174	P ugm-3	18.9337	P ugm-3
2022-07-07	18:00:00	39.7144	P ugm-3	23.1412	P ugm-3
2022-07-07	19:00:00	46.8989	P ugm-3	18.7425	P ugm-3
2022-07-07	20:00:00	48.0964	P ugm-3	16.065	P ugm-3
2022-07-07	21:00:00	47.4977	P ugm-3	13.77	P ugm-3
2022-07-07	22:00:00	45.502	P ugm-3	11.0925	P ugm-3
2022-07-07	23:00:00	44.5041	P ugm-3	9.945	P ugm-3
2022-07-07	1 day, 0:00:00	41.7101	P ugm-3	9.18	P ugm-3
2022-07-08	01:00:00	45.9011	P ugm-3	6.12	P ugm-3
2022-07-08	02:00:00	45.3024	P ugm-3	6.5025	P ugm-3
2022-07-08	03:00:00	39.1157	P ugm-3	8.98875	P ugm-3
2022-07-08	04:00:00	37.9183	P ugm-3	6.5025	P ugm-3
2022-07-08	05:00:00	34.5256	P ugm-3	6.5025	P ugm-3
2022-07-08	06:00:00	30.1351	P ugm-3	11.6662	P ugm-3
2022-07-08	07:00:00	24.5471	P ugm-3	18.1687	P ugm-3
2022-07-08	08:00:00	21.1544	P ugm-3	22.95	P ugm-3
2022-07-08	09:00:00	23.7488	P ugm-3	22.95	P ugm-3
2022-07-08	10:00:00	27.9398	P ugm-3	20.655	P ugm-3
2022-07-08	11:00:00	32.3303	P ugm-3	24.48	P ugm-3
2022-07-08	12:00:00	46.8989	P ugm-3	10.9012	P ugm-3
2022-07-08	13:00:00	44.3045	P ugm-3	19.89	P ugm-3
2022-07-08	14:00:00	50.6908	P ugm-3	16.83	P ugm-3
2022-07-08	15:00:00	46.8989	P ugm-3	19.89	P ugm-3
2022-07-08	16:00:00	45.7015	P ugm-3	23.1412	P ugm-3
2022-07-08	17:00:00	39.7144	P ugm-3	22.5675	P ugm-3
2022-07-08	18:00:00	35.723	P ugm-3	21.8025	P ugm-3
2022-07-08	19:00:00	32.1308	P ugm-3	20.4638	P ugm-3
2022-07-08	20:00:00	28.5385	P ugm-3	19.6988	P ugm-3
2022-07-08	21:00:00	25.1458	P ugm-3	21.9937	P ugm-3
2022-07-08	22:00:00	22.9505	P ugm-3	25.0538	P ugm-3
2022-07-08	23:00:00	19.3583	P ugm-3	29.07	P ugm-3
2022-07-08	1 day, 0:00:00	25.1458	P ugm-3	24.6713	P ugm-3
2022-07-09	01:00:00	34.1265	P ugm-3	14.7263	P ugm-3
2022-07-09	02:00:00	28.3389	P ugm-3	17.0212	P ugm-3
2022-07-09	03:00:00	29.7359	P ugm-3	14.9175	P ugm-3
2022-07-09	04:00:00	37.12	P ugm-3	7.45875	P ugm-3
2022-07-09	05:00:00	32.5299	P ugm-3	6.69375	P ugm-3
2022-07-09	06:00:00	30.7338	P ugm-3	3.4425	P ugm-3
2022-07-09	07:00:00	30.3346	P ugm-3	6.12	P ugm-3
2022-07-09	08:00:00	34.326	P ugm-3	9.18	P ugm-3
2022-07-09	09:00:00	37.12	P ugm-3	9.5625	P ugm-3
2022-07-09	10:00:00	40.1136	P ugm-3	15.3	P ugm-3
2022-07-09	11:00:00	43.9054	P ugm-3	19.5075	P ugm-3
2022-07-09	12:00:00	47.0985	P ugm-3	19.5075	P ugm-3
2022-07-09	13:00:00	47.2981	P ugm-3	22.185	P ugm-3
2022-07-09	14:00:00	48.4955	P ugm-3	21.0375	P ugm-3
2022-07-09	15:00:00	54.8817	P ugm-3	14.7263	P ugm-3
2022-07-09	16:00:00	56.6779	P ugm-3	16.4475	P ugm-3
2022-07-09	17:00:00	53.0856	P ugm-3	20.655	P ugm-3
2022-07-09	18:00:00	48.0964	P ugm-3	16.4475	P ugm-3
2022-07-09	19:00:00	44.3045	P ugm-3	20.0813	P ugm-3
2022-07-09	20:00:00	45.1028	P ugm-3	15.6825	P ugm-3
2022-07-09	21:00:00	38.7166	P ugm-3	16.2563	P ugm-3
2022-07-09	22:00:00	34.1265	P ugm-3	20.0813	P ugm-3
2022-07-09	23:00:00	35.1243	P ugm-3	12.6225	P ugm-3
2022-07-09	1 day, 0:00:00	37.5192	P ugm-3	8.7975	P ugm-3
2022-07-10	01:00:00	38.9162	P ugm-3	7.84125	P ugm-3
2022-07-10	02:00:00	37.9183	P ugm-3	7.45875	P ugm-3
2022-07-10	03:00:00	37.9183	P ugm-3	6.5025	P ugm-3
2022-07-10	04:00:00	36.9205	P ugm-3	6.31125	P ugm-3
2022-07-10	05:00:00	36.1222	P ugm-3	4.78125	P ugm-3
2022-07-10	06:00:00	35.9226	P ugm-3	3.825	P ugm-3
2022-07-10	07:00:00	37.5192	P ugm-3	4.2075	P ugm-3
2022-07-10	08:00:00	38.1179	P ugm-3	4.39875	P ugm-3
2022-07-10	09:00:00	41.5106	P ugm-3	5.92875	P ugm-3
2022-07-10	10:00:00	44.7037	P ugm-3	8.98875	P ugm-3
2022-07-10	11:00:00	44.7037	P ugm-3	15.4913	P ugm-3
2022-07-10	12:00:00	50.6908	P ugm-3	13.3875	P ugm-3
2022-07-10	13:00:00	56.2787	P ugm-3	12.0488	P ugm-3
2022-07-10	14:00:00	59.0727	P ugm-3	15.3	P ugm-3
2022-07-10	15:00:00	67.2551	P ugm-3	15.1088	P ugm-3
2022-07-10	16:00:00	69.6499	P ugm-3	17.9775	P ugm-3
2022-07-10	17:00:00	77.034	P ugm-3	11.6662	P ugm-3
2022-07-10	18:00:00	74.24	P ugm-3	14.9175	P ugm-3
2022-07-10	19:00:00	66.0577	P ugm-3	15.4913	P ugm-3
2022-07-10	20:00:00	52.6865	P ugm-3	19.3163	P ugm-3
2022-07-10	21:00:00	31.9312	P ugm-3	22.3762	P ugm-3
2022-07-10	22:00:00	27.5407	P ugm-3	21.2288	P ugm-3
2022-07-10	23:00:00	26.5428	P ugm-3	17.2125	P ugm-3
2022-07-10	1 day, 0:00:00	28.1394	P ugm-3	13.1962	P ugm-3
2022-07-11	01:00:00	29.5364	P ugm-3	9.5625	P ugm-3
2022-07-11	02:00:00	22.5514	P ugm-3	12.4313	P ugm-3
2022-07-11	03:00:00	17.5622	P ugm-3	14.3438	P ugm-3
2022-07-11	04:00:00	1.39699	P ugm-3	24.48	P ugm-3
2022-07-11	05:00:00	1.59656	P ugm-3	26.3925	P ugm-3
2022-07-11	06:00:00	2.99355	P ugm-3	24.8625	P ugm-3
2022-07-11	07:00:00	10.1781	P ugm-3	30.2175	P ugm-3
2022-07-11	08:00:00	17.7617	P ugm-3	40.3537	P ugm-3
2022-07-11	09:00:00	37.3196	P ugm-3	32.895	P ugm-3
2022-07-11	10:00:00	51.4891	P ugm-3	29.4525	P ugm-3
2022-07-11	11:00:00	69.4504	P ugm-3	24.8625	P ugm-3
2022-07-11	12:00:00	81.6241	P ugm-3	17.7862	P ugm-3
2022-07-11	13:00:00	90.6048	P ugm-3	16.065	P ugm-3
2022-07-11	14:00:00	87.6112	P ugm-3	20.655	P ugm-3
2022-07-11	15:00:00	83.4203	P ugm-3	23.1412	P ugm-3
2022-07-11	16:00:00	88.6091	P ugm-3	23.3325	P ugm-3
2022-07-11	17:00:00	90.6048	P ugm-3	23.1412	P ugm-3
2022-07-11	18:00:00	96.3923	P ugm-3	18.7425	P ugm-3
2022-07-11	19:00:00	109.165	P ugm-3	11.6662	P ugm-3
2022-07-11	20:00:00	96.7914	P ugm-3	13.3875	P ugm-3
2022-07-11	21:00:00	91.6026	P ugm-3	12.4313	P ugm-3
2022-07-11	22:00:00	81.225	P ugm-3	15.3	P ugm-3
2022-07-11	23:00:00	66.6564	P ugm-3	24.0975	P ugm-3
2022-07-11	1 day, 0:00:00	72.4439	P ugm-3	12.8138	P ugm-3
2022-07-12	01:00:00	69.2508	P ugm-3	9.37125	P ugm-3
2022-07-12	02:00:00	58.8732	P ugm-3	14.9175	P ugm-3
2022-07-12	03:00:00	54.4826	P ugm-3	13.5787	P ugm-3
2022-07-12	04:00:00	55.0813	P ugm-3	12.0488	P ugm-3
2022-07-12	05:00:00	49.0942	P ugm-3	16.6388	P ugm-3
2022-07-12	06:00:00	49.0942	P ugm-3	18.5512	P ugm-3
2022-07-12	07:00:00	40.5127	P ugm-3	31.5562	P ugm-3
2022-07-12	08:00:00	44.5041	P ugm-3	30.7913	P ugm-3
2022-07-12	09:00:00	63.6628	P ugm-3	21.0375	P ugm-3
2022-07-12	10:00:00	69.0512	P ugm-3	20.2725	P ugm-3
2022-07-12	11:00:00	69.6499	P ugm-3	21.0375	P ugm-3
2022-07-12	12:00:00	71.2465	P ugm-3	18.7425	P ugm-3
2022-07-12	13:00:00	76.2357	P ugm-3	12.6225	P ugm-3
2022-07-12	14:00:00	79.828	P ugm-3	18.1687	P ugm-3
2022-07-12	15:00:00	84.4181	P ugm-3	15.1088	P ugm-3
2022-07-12	16:00:00	82.0233	P ugm-3	14.9175	P ugm-3
2022-07-12	17:00:00	73.0426	P ugm-3	18.7425	P ugm-3
2022-07-12	18:00:00	64.2615	P ugm-3	28.305	P ugm-3
2022-07-12	19:00:00	70.6478	P ugm-3	15.8737	P ugm-3
2022-07-12	20:00:00	73.6413	P ugm-3	11.0925	P ugm-3
2022-07-12	21:00:00	65.2594	P ugm-3	20.8463	P ugm-3
2022-07-12	22:00:00	53.2852	P ugm-3	28.8788	P ugm-3
2022-07-12	23:00:00	70.6478	P ugm-3	12.6225	P ugm-3
2022-07-12	1 day, 0:00:00	58.0749	P ugm-3	20.4638	P ugm-3
2022-07-13	01:00:00	63.6628	P ugm-3	14.3438	P ugm-3
2022-07-13	02:00:00	70.4482	P ugm-3	7.07625	P ugm-3
2022-07-13	03:00:00	69.6499	P ugm-3	5.92875	P ugm-3
2022-07-13	04:00:00	54.283	P ugm-3	5.7375	P ugm-3
2022-07-13	05:00:00	41.7101	P ugm-3	5.7375	P ugm-3
2022-07-13	06:00:00	44.105	P ugm-3	6.69375	P ugm-3
2022-07-13	07:00:00	43.3067	P ugm-3	12.4313	P ugm-3
2022-07-13	08:00:00	40.3131	P ugm-3	15.4913	P ugm-3
2022-07-13	09:00:00	43.1071	P ugm-3	18.36	P ugm-3
2022-07-13	10:00:00	48.8946	P ugm-3	13.9612	P ugm-3
2022-07-13	11:00:00	54.8817	P ugm-3	11.0925	P ugm-3
2022-07-13	12:00:00	57.4762	P ugm-3	15.1088	P ugm-3
2022-07-13	13:00:00	62.4654	P ugm-3	11.2837	P ugm-3
2022-07-13	14:00:00	61.4676	P ugm-3	14.535	P ugm-3
2022-07-13	15:00:00	64.2615	P ugm-3	9.18	P ugm-3
2022-07-13	16:00:00	57.077	P ugm-3	17.0212	P ugm-3
2022-07-13	17:00:00	54.0835	P ugm-3	18.5512	P ugm-3
2022-07-13	18:00:00	53.0856	P ugm-3	17.7862	P ugm-3
2022-07-13	19:00:00	48.6951	P ugm-3	16.2563	P ugm-3
2022-07-13	20:00:00	45.7015	P ugm-3	17.595	P ugm-3
2022-07-13	21:00:00	44.3045	P ugm-3	17.0212	P ugm-3
2022-07-13	22:00:00	38.1179	P ugm-3	18.9337	P ugm-3
2022-07-13	23:00:00	33.3282	P ugm-3	20.8463	P ugm-3
2022-07-13	1 day, 0:00:00	36.3217	P ugm-3	14.9175	P ugm-3
2022-07-14	01:00:00	41.5106	P ugm-3	9.37125	P ugm-3
2022-07-14	02:00:00	25.3454	P ugm-3	14.535	P ugm-3
2022-07-14	03:00:00	24.5471	P ugm-3	16.83	P ugm-3
2022-07-14	04:00:00	19.5579	P ugm-3	26.3925	P ugm-3
2022-07-14	05:00:00	9.18022	P ugm-3	39.3975	P ugm-3
2022-07-14	06:00:00	21.354	P ugm-3	27.7312	P ugm-3
2022-07-14	07:00:00	34.1265	P ugm-3	13.1962	P ugm-3
2022-07-14	08:00:00	32.1308	P ugm-3	14.1525	P ugm-3
2022-07-14	09:00:00	31.5321	P ugm-3	22.5675	P ugm-3
2022-07-14	10:00:00	37.3196	P ugm-3	15.4913	P ugm-3
2022-07-14	11:00:00	34.326	P ugm-3	20.4638	P ugm-3
2022-07-14	12:00:00	39.914	P ugm-3	17.9775	P ugm-3
2022-07-14	13:00:00	45.1028	P ugm-3	20.2725	P ugm-3
2022-07-14	14:00:00	46.4998	P ugm-3	24.2888	P ugm-3
2022-07-14	15:00:00	51.6886	P ugm-3	15.8737	P ugm-3
2022-07-14	16:00:00	48.6951	P ugm-3	17.4037	P ugm-3
2022-07-14	17:00:00	49.2938	P ugm-3	14.1525	P ugm-3
2022-07-14	18:00:00	46.4998	P ugm-3	15.4913	P ugm-3
2022-07-14	19:00:00	44.105	P ugm-3	16.6388	P ugm-3
2022-07-14	20:00:00	44.9032	P ugm-3	13.5787	P ugm-3
2022-07-14	21:00:00	41.9097	P ugm-3	14.1525	P ugm-3
2022-07-14	22:00:00	28.9377	P ugm-3	26.2013	P ugm-3
2022-07-14	23:00:00	27.5407	P ugm-3	26.2013	P ugm-3
2022-07-14	1 day, 0:00:00	21.1544	P ugm-3	29.835	P ugm-3
2022-07-15	01:00:00	21.5536	P ugm-3	26.01	P ugm-3
2022-07-15	02:00:00	11.5751	P ugm-3	35.7638	P ugm-3
2022-07-15	03:00:00	12.1738	P ugm-3	32.895	P ugm-3
2022-07-15	04:00:00	31.1329	P ugm-3	12.24	P ugm-3
2022-07-15	05:00:00	30.1351	P ugm-3	12.6225	P ugm-3
2022-07-15	06:00:00	26.9419	P ugm-3	17.4037	P ugm-3
2022-07-15	07:00:00	17.5622	P ugm-3	30.7913	P ugm-3
2022-07-15	08:00:00	25.1458	P ugm-3	27.7312	P ugm-3
2022-07-15	09:00:00	36.7209	P ugm-3	18.9337	P ugm-3
2022-07-15	10:00:00	44.9032	P ugm-3	13.77	P ugm-3
2022-07-15	11:00:00	49.0942	P ugm-3	15.1088	P ugm-3
2022-07-15	12:00:00	46.4998	P ugm-3	14.535	P ugm-3
2022-07-15	13:00:00	46.4998	P ugm-3	18.5512	P ugm-3
2022-07-15	14:00:00	47.8968	P ugm-3	17.7862	P ugm-3
2022-07-15	15:00:00	46.6994	P ugm-3	17.9775	P ugm-3
2022-07-15	16:00:00	45.3024	P ugm-3	18.36	P ugm-3
2022-07-15	17:00:00	48.0964	P ugm-3	17.7862	P ugm-3
2022-07-15	18:00:00	49.0942	P ugm-3	16.4475	P ugm-3
2022-07-15	19:00:00	51.6886	P ugm-3	13.77	P ugm-3
2022-07-15	20:00:00	48.2959	P ugm-3	16.83	P ugm-3
2022-07-15	21:00:00	39.3153	P ugm-3	21.42	P ugm-3
2022-07-15	22:00:00	35.723	P ugm-3	23.9062	P ugm-3
2022-07-15	23:00:00	36.7209	P ugm-3	16.83	P ugm-3
2022-07-15	1 day, 0:00:00	37.5192	P ugm-3	12.8138	P ugm-3
2022-07-16	01:00:00	33.7273	P ugm-3	14.7263	P ugm-3
2022-07-16	02:00:00	24.7467	P ugm-3	18.9337	P ugm-3
2022-07-16	03:00:00	21.5536	P ugm-3	20.2725	P ugm-3
2022-07-16	04:00:00	24.5471	P ugm-3	12.6225	P ugm-3
2022-07-16	05:00:00	20.9549	P ugm-3	14.1525	P ugm-3
2022-07-16	06:00:00	21.9527	P ugm-3	13.77	P ugm-3
2022-07-16	07:00:00	31.3325	P ugm-3	11.2837	P ugm-3
2022-07-16	08:00:00	43.3067	P ugm-3	12.0488	P ugm-3
2022-07-16	09:00:00	38.9162	P ugm-3	19.6988	P ugm-3
2022-07-16	10:00:00	39.5149	P ugm-3	18.7425	P ugm-3
2022-07-16	11:00:00	44.7037	P ugm-3	16.4475	P ugm-3
2022-07-16	12:00:00	54.0835	P ugm-3	16.4475	P ugm-3
2022-07-16	13:00:00	60.4697	P ugm-3	18.9337	P ugm-3
2022-07-16	14:00:00	66.6564	P ugm-3	23.715	P ugm-3
2022-07-16	15:00:00	70.6478	P ugm-3	25.8188	P ugm-3
2022-07-16	16:00:00	77.4332	P ugm-3	26.2013	P ugm-3
2022-07-16	17:00:00	77.4332	P ugm-3	32.3212	P ugm-3
2022-07-16	18:00:00	80.0276	P ugm-3	28.8788	P ugm-3
2022-07-16	19:00:00	80.8259	P ugm-3	28.6875	P ugm-3
2022-07-16	20:00:00	83.6198	P ugm-3	21.9937	P ugm-3
2022-07-16	21:00:00	73.8409	P ugm-3	24.48	P ugm-3
2022-07-16	22:00:00	76.6349	P ugm-3	17.0212	P ugm-3
2022-07-16	23:00:00	48.4955	P ugm-3	39.78	P ugm-3
2022-07-16	1 day, 0:00:00	50.4912	P ugm-3	31.5562	P ugm-3
2022-07-17	01:00:00	54.6822	P ugm-3	17.9775	P ugm-3
2022-07-17	02:00:00	59.2723	P ugm-3	17.0212	P ugm-3
2022-07-17	03:00:00	55.2809	P ugm-3	20.4638	P ugm-3
2022-07-17	04:00:00	57.8753	P ugm-3	15.8737	P ugm-3
2022-07-17	05:00:00	61.8667	P ugm-3	12.8138	P ugm-3
2022-07-17	06:00:00	62.0663	P ugm-3	15.8737	P ugm-3
2022-07-17	07:00:00	61.6671	P ugm-3	15.4913	P ugm-3
2022-07-17	08:00:00	71.6456	P ugm-3	13.1962	P ugm-3
2022-07-17	09:00:00	81.0254	P ugm-3	10.3275	P ugm-3
2022-07-17	10:00:00	87.0125	P ugm-3	13.1962	P ugm-3
2022-07-17	11:00:00	93.3988	P ugm-3	17.595	P ugm-3
2022-07-17	12:00:00	94.7957	P ugm-3	17.2125	P ugm-3
2022-07-17	13:00:00	94.3966	P ugm-3	17.2125	P ugm-3
2022-07-17	14:00:00	96.5919	P ugm-3	17.2125	P ugm-3
2022-07-17	15:00:00	97.3902	P ugm-3	16.4475	P ugm-3
2022-07-17	16:00:00	101.182	P ugm-3	15.1088	P ugm-3
2022-07-17	17:00:00	107.768	P ugm-3	9.75375	P ugm-3
2022-07-17	18:00:00	108.566	P ugm-3	10.71	P ugm-3
2022-07-17	19:00:00	108.766	P ugm-3	11.2837	P ugm-3
2022-07-17	20:00:00	105.573	P ugm-3	13.9612	P ugm-3
2022-07-17	21:00:00	98.7871	P ugm-3	14.535	P ugm-3
2022-07-17	22:00:00	93.3988	P ugm-3	15.3	P ugm-3
2022-07-17	23:00:00	87.8108	P ugm-3	16.83	P ugm-3
2022-07-17	1 day, 0:00:00	92.4009	P ugm-3	8.7975	P ugm-3
2022-07-18	01:00:00	88.2099	P ugm-3	9.75375	P ugm-3
2022-07-18	02:00:00	78.0319	P ugm-3	15.4913	P ugm-3
2022-07-18	03:00:00	84.019	P ugm-3	9.5625	P ugm-3
2022-07-18	04:00:00	82.4224	P ugm-3	10.3275	P ugm-3
2022-07-18	05:00:00	73.4418	P ugm-3	17.7862	P ugm-3
2022-07-18	06:00:00	65.8581	P ugm-3	23.5237	P ugm-3
2022-07-18	07:00:00	58.474	P ugm-3	33.66	P ugm-3
2022-07-18	08:00:00	56.0792	P ugm-3	41.8837	P ugm-3
2022-07-18	09:00:00	61.8667	P ugm-3	44.37	P ugm-3
2022-07-18	10:00:00	72.2443	P ugm-3	43.9875	P ugm-3
2022-07-18	11:00:00	94.7957	P ugm-3	32.7037	P ugm-3
2022-07-18	12:00:00	95.594	P ugm-3	34.8075	P ugm-3
2022-07-18	13:00:00	104.575	P ugm-3	29.07	P ugm-3
2022-07-18	14:00:00	91.6026	P ugm-3	39.015	P ugm-3
2022-07-18	15:00:00	88.0104	P ugm-3	36.9113	P ugm-3
2022-07-18	16:00:00	101.182	P ugm-3	24.6713	P ugm-3
2022-07-18	17:00:00	104.974	P ugm-3	25.0538	P ugm-3
2022-07-18	18:00:00	114.354	P ugm-3	21.8025	P ugm-3
2022-07-18	19:00:00	111.36	P ugm-3	30.0263	P ugm-3
2022-07-18	20:00:00	107.568	P ugm-3	31.365	P ugm-3
2022-07-18	21:00:00	97.7893	P ugm-3	36.5288	P ugm-3
2022-07-18	22:00:00	100.384	P ugm-3	29.2613	P ugm-3
2022-07-18	23:00:00	103.377	P ugm-3	23.5237	P ugm-3
2022-07-18	1 day, 0:00:00	95.9932	P ugm-3	24.2888	P ugm-3
End
